# Supplementary material for: Are microsatellite fragment lengths useful for population-level studies? The case of Polygala lewtonii (Polygalaceae)
Source: PubMed Central journal article supplement — Appl Plant Sci. 2016 Feb 15;4(2):apps.1500115. doi: 10.3732/apps.1500115 (PMC4760751; doi:10.3732/apps.1500115), 2016-02-15

APPENDIX S4. Contributions of populations of *Polygala lewtonii* to allelic richness over three loci. Allelic diversity of each population (blue diamonds) is composed of its contribution to the total diversity (red bar) and its divergence from other populations (green bar). Results are given for fragment length (A), repeat number (B), and flanking region sequence (C).

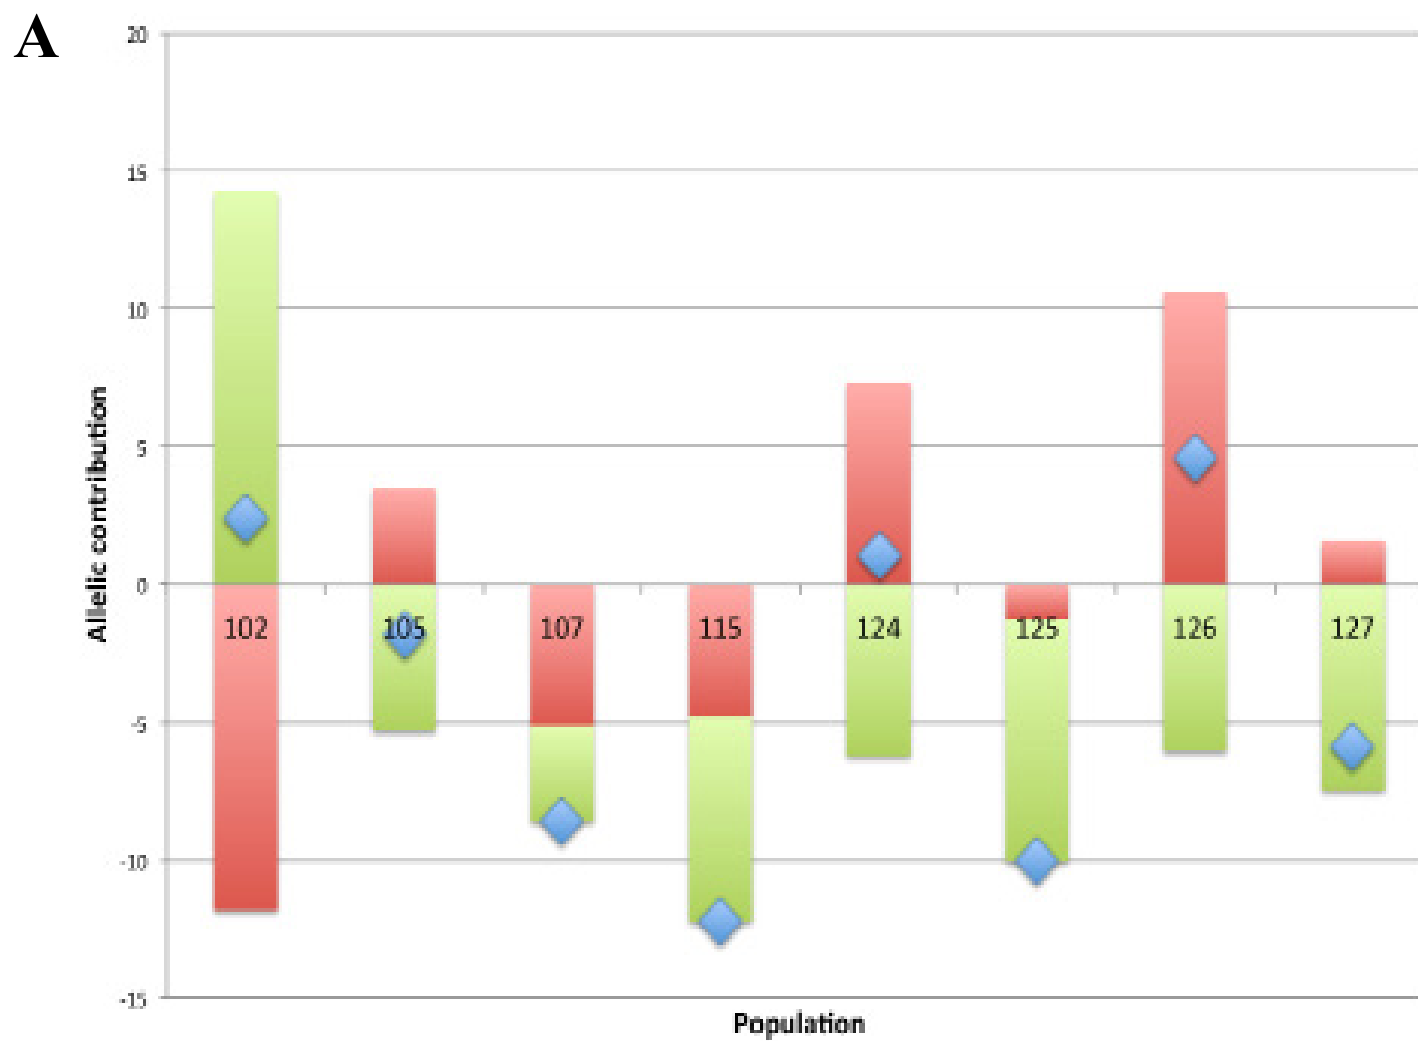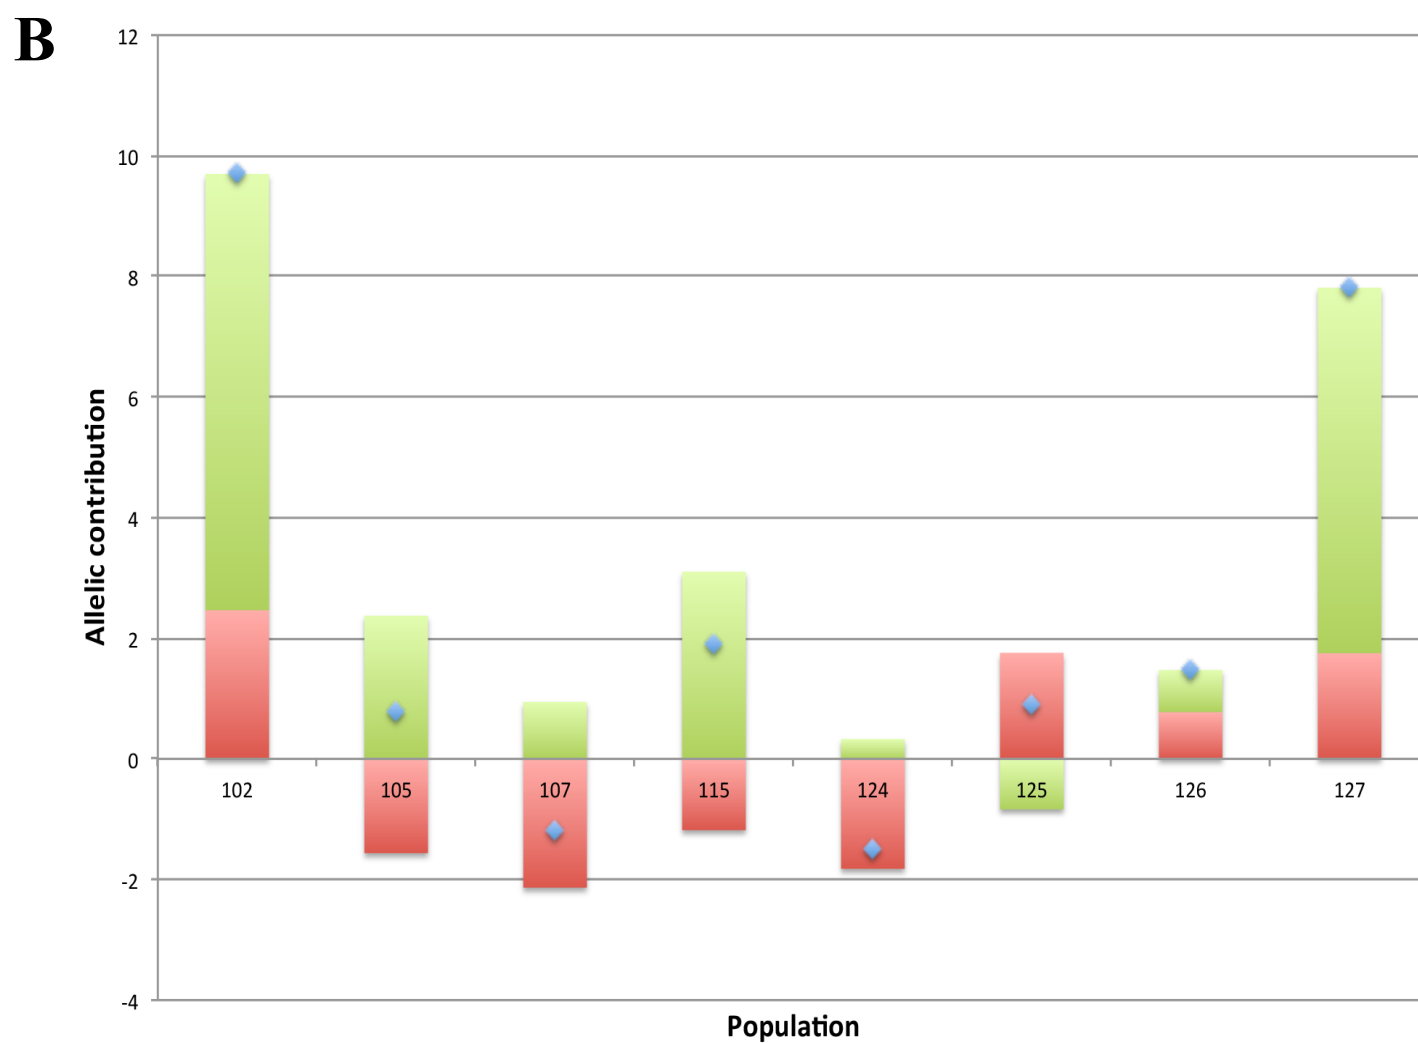

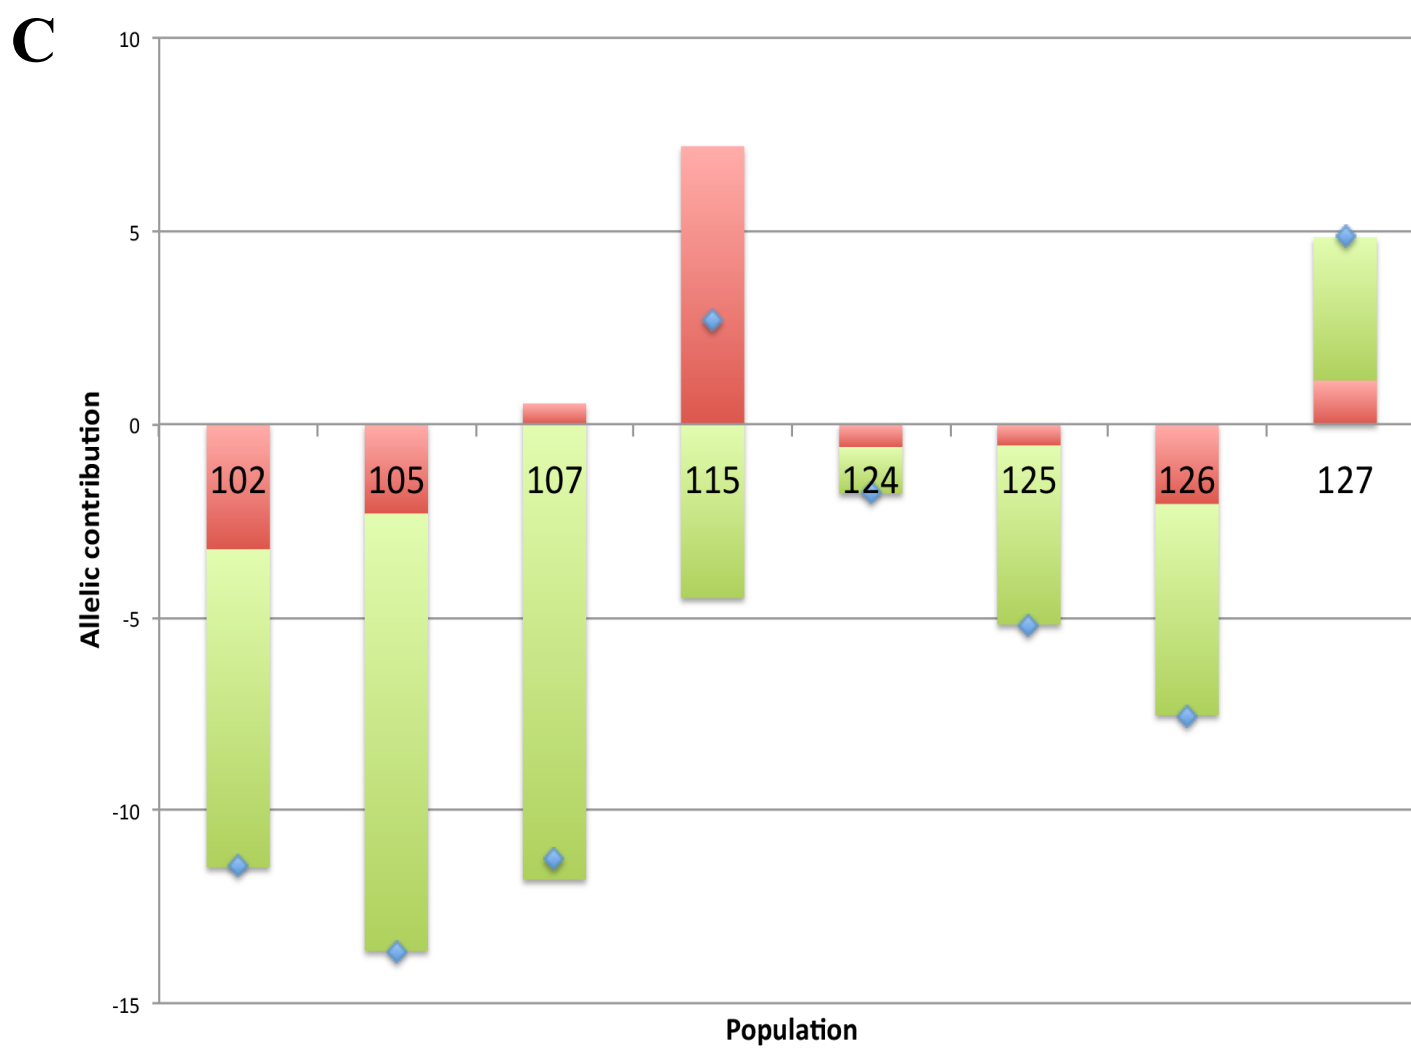

Supplement: apps.1500115_s4.pdf [file apps.1500115_s4.pdf]
