# Supplementary material for: Are microsatellite fragment lengths useful for population-level studies? The case of Polygala lewtonii (Polygalaceae)
Source: PubMed Central journal article supplement — Appl Plant Sci. 2016 Feb 15;4(2):apps.1500115. doi: 10.3732/apps.1500115 (PMC4760751; doi:10.3732/apps.1500115), 2016-02-15

APPENDIX S5. Neighbor-joining tree based on genetic distance matrix from fragment length. *Polygala polygama* is in purple, *P. lew-tonii* is in black, and population 108, in green, is shown nested in the purple clade.

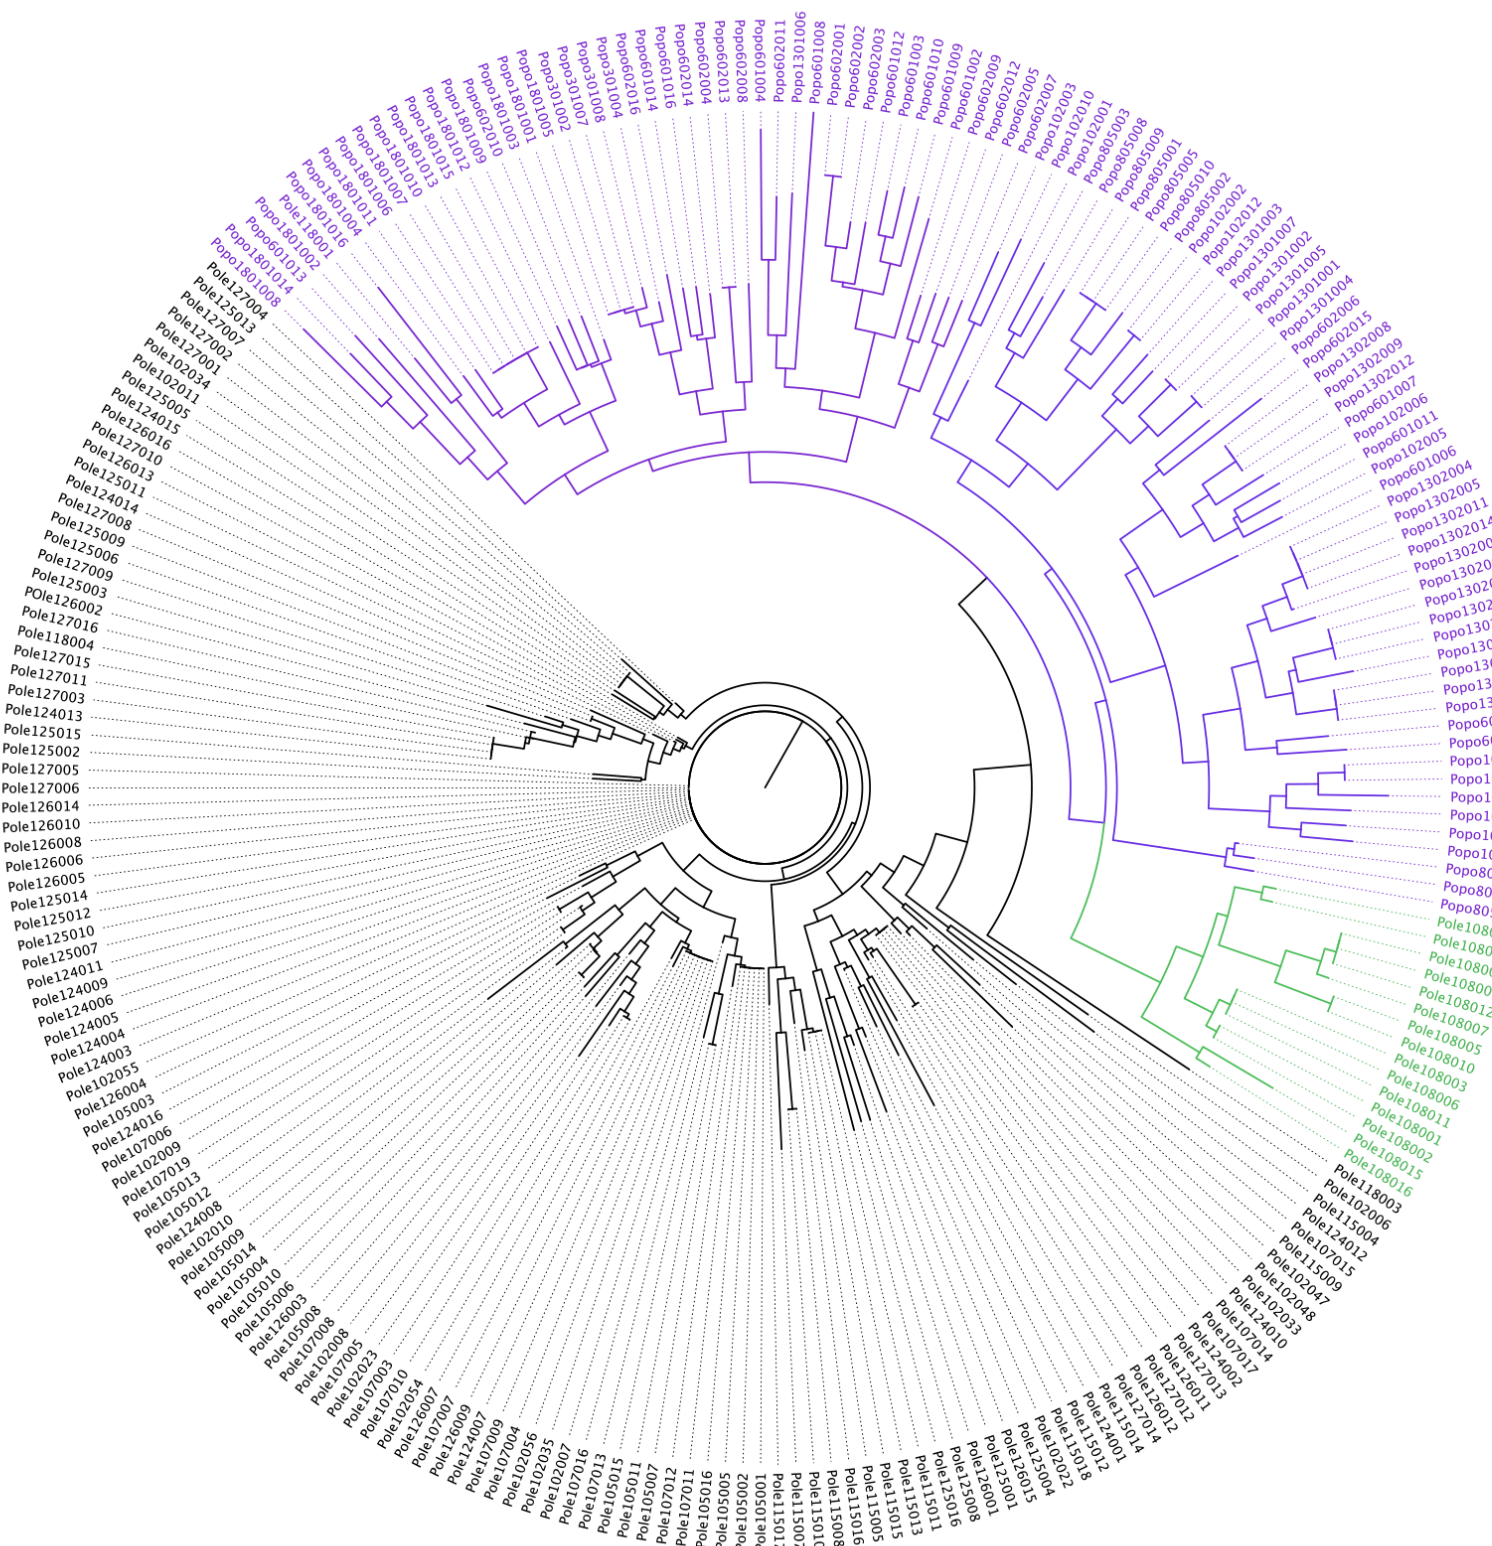

Supplement: apps.1500115_s5.pdf [file apps.1500115_s5.pdf]
